# Supplementary material for: Stability and resistance of nickel catalysts for hydrodeoxygenation: carbon deposition and effects of sulfur, potassium, and chlorine in the feed
Source: Royal Society of Chemistry journal article supplement (doi:10.1039/c4cy00522h), 2014-06-13
Supplement: c4cy00522h1.pdf [file c4cy00522h1.pdf]

# Stability and Resistance of Nickel Catalysts for Hydrodeoxygenation: Carbon deposition and effects of Sulfur, Potassium, and Chlorine in the Feed

Peter M. Mortensen,<sup>a,†</sup> Diego Gardini,<sup>b</sup> Hudson W. P. de Carvalho,<sup>c</sup> Christian D. Damsgaard,<sup>b,d</sup> Jan-Dierk Grunwaldt,<sup>c</sup> Peter A. Jensen,<sup>a</sup> Jakob B. Wagner,<sup>b</sup> and Anker D. Jensen<sup>\*a</sup>

<sup>a</sup>Department of Chemical and Biochemical Engineering, Technical University of Denmark, Søltofts Plads, Building 229, DK-2800 Lyngby, Denmark. Fax: +45 4588 2258 Tel.: +45 4525 2841. E-mail address: aj@kt.dtu.dk.

<sup>b</sup>Center for Electron Nanoscopy, Technical University of Denmark, Fysikvej, Building 307, DK-2800 Lyngby, Denmark

<sup>c</sup>Institute for Chemical Technology and Polymer Chemistry, Karlsruhe Institute of Technology (KIT), Engesserstrasse 20, D-79131 Karlsruhe, Germany

<sup>d</sup>CINF, Department of Physics, Technical University of Denmark, Fysikvej, Building 307, DK-2800 Lyngby, Denmark

## S-1 Reduction Temperature of Ni/ZrO<sub>2</sub>

To evaluate the required reduction temperature, the reduction of the calcined NiO/ZrO<sub>2</sub> was monitored by in-situ XAS, Figure 1(a) presents the evolution of the Ni-K near edge region as function of the temperature. The decrease in the absorption threshold intensity during the activation step show that Ni was being reduced. Furthermore, all spectra shown in Figure 1(a) are superposed at the same isosbestic points indicating that conversion of calcined Ni species to the reduced Ni phase took place in a single step. The fraction of oxidized and reduced phase was estimated by linear combination analysis and is presented in Figure 1(b). The reduction rate strongly increased from 264 °C and was completed at 450 °C. Thus, in all experiments a reduction temperature of 500 °C was used to ensure complete reduction of the catalysts.

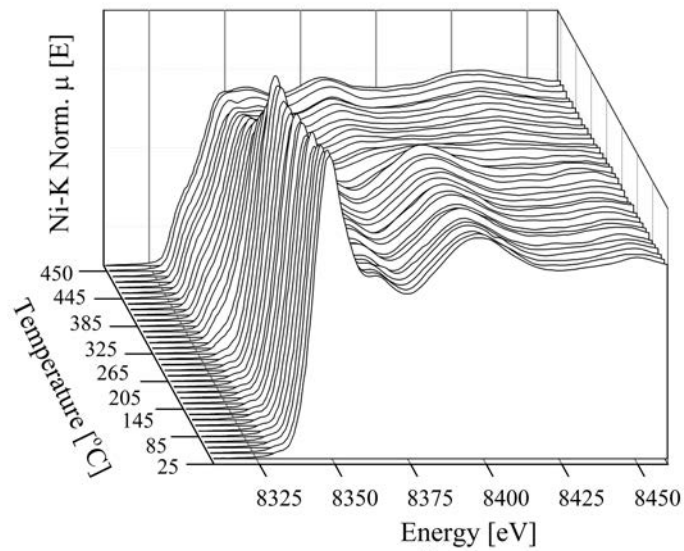

(a) Ni-K X-ray absorption near edge spectra

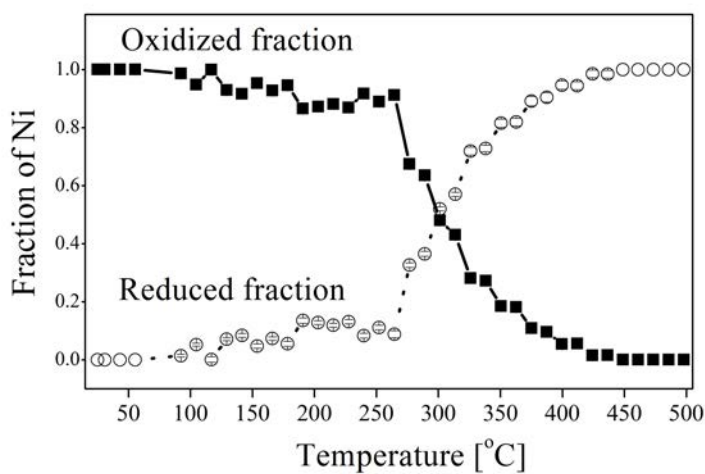

(b) Fraction of oxidized and reduced Ni

Figure S-1: Ni-K X-ray absorption near edge spectra recorded as function of the temperature during the reduction of the catalyst (a) and linear combination results estimating the fraction of oxidized and reduced Ni phases during the reduction of the catalyst (b).

## S-2 Transport Limitations

To evaluate the effect of the external diffusion, Mears' criterion for external diffusion was used. This states that the external diffusion limitations can be neglected if [1]:

$$C_M = \frac{r'(obs) \cdot \rho_b \cdot d_p \cdot n}{2 \cdot k_c \cdot C_{Ab}} < 0.15 \quad (S-1)$$

Here  $r'$  is a measured reaction rate,  $\rho_b$  is the bulk density of the catalyst bed (found as 950 kg/m<sup>3</sup>),  $d_p$  is the diameter of the catalyst particles,  $n$  is the reaction order,  $k_c$  is the mass transfer coefficient, and  $C_{Ab}$  is the concentration of reactant  $A$  in the bulk.

Mears' criterion is an evaluation of the external diffusion of one compound. As hydrogenation of guaiacol is the fastest reaction in the present system, this reaction will be evaluated and therefore the diffusion of this in 1-octanol.

The reaction rate is evaluated on the basis of the kinetic model developed for the system and the reaction rate in the inlet to the system is used:

$$r_1 = k'_1 \cdot C_{0,Guaiacol} \cdot (1 - X_1) \quad (S-2)$$

$$= 500ml/(kg \cdot min) \cdot 900mol/m^3 \cdot (1 - 0) \quad (S-3)$$

$$= 7.5 \cdot 10^{-3}mol/(kg \cdot s) \quad (S-4)$$

The particle diameter was controlled by sieving the catalyst, obtaining a particle size in the range from 300  $\mu$ m to 600  $\mu$ m. In order to consider the worst case scenario, the largest particle diameter was used in the calculations.

The reaction order was assumed to be 1.

$D_{AB}$  was estimated from the Wilke-Chang method [2]:

$$D_{AB} = 7.4 \cdot 10^{-8} \cdot \frac{\sqrt{\psi_B \cdot M_B \cdot T}}{\mu \cdot \tilde{V}_A^{0.6}} \quad (S-5)$$

Here  $\psi_B$  is an association parameter assumed to be 1 for 1-octanol [3],  $M_B$  the molar mass of 1-octanol (130.23 g/mol),  $T$  the temperature in Kelvin,  $\mu$  the viscosity of the mixture in cP (0.65 cP for 1-Octanol [4]), and  $\tilde{V}_A$  is the molar volume of guaiacol in cm<sup>3</sup>/mol (111.6 cm<sup>3</sup>/mol). In this way the diffusion coefficient for guaiacol in 1-octanol can be found as  $4.01 \cdot 10^{-9}$  m<sup>2</sup>/s. This is needed to calculate  $k_c$ , which will be done from the correlation between the Reynolds number (Re), the Schmidt number (Sc) and the Sherwood number (Sh). The estimated Reynolds and Schmidt numbers are:

$$Re = \frac{F}{A} \cdot d_p \cdot \rho_l \quad (S-6)$$

$$= \frac{0.2ml/min}{5 \cdot 10^{-5}m^2} \cdot 0.6mm \cdot 0.824g/ml \quad (S-7)$$

$$Sc = \frac{\mu}{\rho_l \cdot D_{AB}} \quad (S-8)$$

$$= \frac{0.65cP}{0.824g/ml \cdot 4.01 \cdot 10^{-9}m^2/s} = 197 \quad (S-9)$$

Here  $F$  is the flow,  $A$  the cross section area, and  $\rho_l$  the density of the liquid. These can be used to calculate the Sherwood number ( $Sh$ ) [1]:

$$Sh = \left( \frac{0.765}{Re^{0.82}} + \frac{0.365}{Re^{0.386}} \right) \frac{Sc^{1/3} \cdot Re}{1 - \phi_b} \quad (S-10)$$

$$= \left( \frac{0.765}{0.13^{0.82}} + \frac{0.365}{0.13^{0.386}} \right) \frac{197^{1/3} \cdot 1.45}{1 - 0.4} = 8.22 \quad (S-11)$$

Here  $\phi_b$  is the porosity of the bed, which was assumed to be 0.4.

The mass transfer coefficient is obtained from the Sherwood number:

$$k_c = \frac{Sh \cdot D_{AB}}{d_p} \quad (\text{S-12})$$

$$= \frac{8.22 \cdot 4.01 \cdot 10^{-9} \text{m}^2/\text{s}}{0.6 \text{mm}} = 5.50 \cdot 10^{-5} \text{m/s} \quad (\text{S-13})$$

From this, Mears can now be found to be 0.04, which is significantly lower than 0.15 and thereby indicating that the reaction is not limited by external diffusion.

Based on the previous results of no external diffusion limitation the Weisz-Prater criteria can be used in the estimation of internal diffusion limitations [1]:

$$C_{wp} = \frac{r'(obs) \cdot \rho_c \cdot \left(\frac{d_p}{2}\right)^2}{D_e \cdot C_{As}} \quad (\text{S-14})$$

Here  $D_e$  is the effective diffusion coefficient, and  $C_{As}$  is the concentration of the investigated compound at the surface of the catalyst.

$r'(obs)$  is determined analogously to what was done in Eq. S-2, and  $d_p$  is the same catalyst particle diameter as discussed above.  $C_{As}$  can be assumed equal to the concentration in the bulk, because it was concluded that there was no external diffusion limitation.

The effective diffusion coefficient is estimated as:

$$D_e = \frac{\phi_c \cdot \vartheta_c}{\tau_c} \cdot \frac{1}{\frac{1}{D_K} + \frac{1}{D_{AB}}} \quad (\text{S-15})$$

Here  $\phi_c$  is the porosity of the catalyst,  $\vartheta_c$  is the constriction factor, and  $\tau_c$  is the tortuosity.

The Knudsen diffusivity,  $D_K$ , is given by [5]:

$$D_K = 9700 \cdot a \cdot \left(\frac{T}{M_A}\right)^{1/2} \quad (\text{S-16})$$

$$= 9700 \cdot 2 \cdot 10^{-6} \text{cm} \cdot \left(\frac{523\text{K}}{124.14\text{g/mol}}\right)^{1/2} \quad (\text{S-17})$$

$$= 0.0398 \text{cm}^2/\text{s} = 3.98 \cdot 10^{-6} \text{m}^2/\text{s} \quad (\text{S-18})$$

Here  $a$  is the radius of the pores inside the catalyst. This is set to 20 nm which is the average pore size for the given catalyst as specified for this support by Saint-Gobain NorPro. The bulk diffusion coefficient is the same as that determined in Eq. S-5.

$\phi_c$ ,  $\vartheta_c$ , and  $\tau_c$  have been estimated to the respective values of 0.33, 0.8, and 2.5. Whereby the effective diffusion coefficient can be calculated as:

$$D_e = \frac{0.33 \cdot 0.8}{2.5} \cdot \frac{1}{\frac{1}{3.98 \cdot 10^{-6} \text{m}^2/\text{s}} + \frac{1}{4.01 \cdot 10^{-9} \text{m}^2/\text{s}}} \quad (\text{S-19})$$

$$= 4.23 \cdot 10^{-10} \text{m}^2/\text{s} \quad (\text{S-20})$$

Hereby  $C_{wp}$  can be found to be 1.9 and as this criterion states that if  $C_{wp} \ll 1$  no interior diffusion problems exist, it is indicated that internal transport limitation probably exist for the largest particles. With a particle size of 300  $\mu\text{m}$   $C_{wp}$  is 0.49.

To further evaluate this, the effectiveness factor ( $\eta_{eff}$ ) of a single catalyst pellet was evaluated, which for a first order reaction is given by [1]:

$$\eta_{eff} = \frac{3}{\phi^2} \cdot (\phi \cdot \coth \phi - 1), \quad (S-21)$$

$$\phi^2 = \frac{\rho_c \cdot k_1 \cdot (d_p/2)^2}{D_e} \quad (S-22)$$

In Figure S-2,  $\eta_{eff}$  is plotted as a function of particle size, showing that the smaller particles (radius of 150  $\mu\text{m}$ ) has an effectiveness in the order of 97 %, but the larger (radius of 300  $\mu\text{m}$ ) are in the order of 89%.

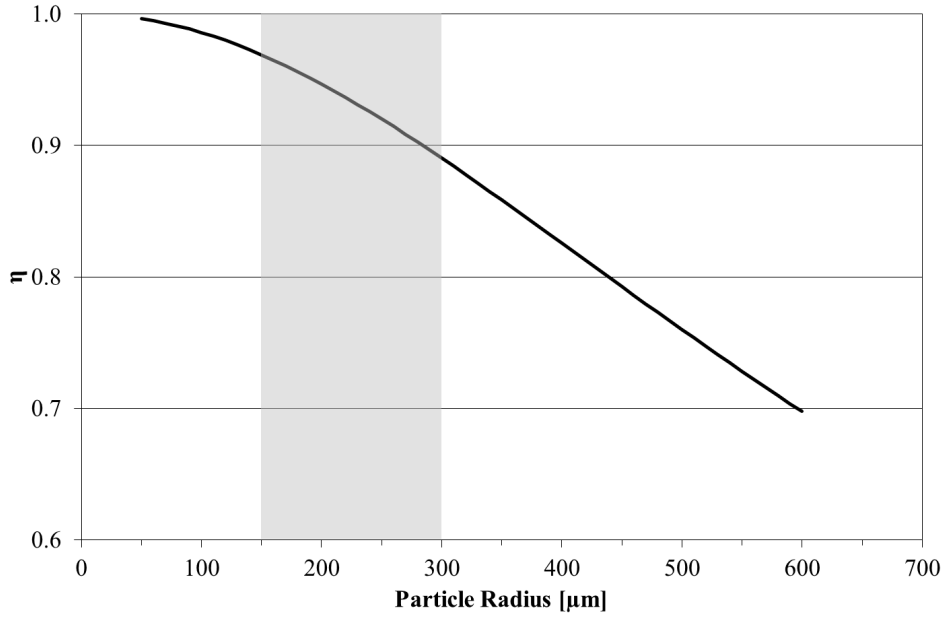

Figure S-2: Effectiveness factor as a function of particle radius for the given system of hydrogenation of guaiacol. Grey area indicate the used particle fraction.



The reaction takes place in a plug flow reactor, for which the mole balances are [1]:

$$C_{0,\text{Guaiacol}} \cdot v \cdot \frac{dX_1}{dW} = r_1 \quad (\text{S-35})$$

$$C_{0,\text{Guaiacol}} \cdot v \cdot \frac{dX_2}{dW} = r_2 \quad (\text{S-36})$$

$$C_{0,\text{Guaiacol}} \cdot v \cdot \frac{dX_3}{dW} = r_3 \quad (\text{S-37})$$

$$C_{0,1\text{-Octanol}} \cdot v \cdot \frac{dX_4}{dW} = r_4 \quad (\text{S-38})$$

Here  $v$  is the feed flow and  $W$  is the mass of catalyst. Using zero as initial conditions of the conversions, the differential equation can be solved algebraically as:

$$X_1 = 1 - \exp\left(-k'_1 \cdot \frac{W}{v}\right) \quad (\text{S-39})$$

$$X_2 = 1 - \frac{k'_1 \cdot \exp\left(-k'_2 \cdot \frac{W}{v}\right) - k'_2 \cdot \exp\left(-k'_1 \cdot \frac{W}{v}\right)}{k'_1 - k'_2} \quad (\text{S-40})$$

$$X_3 = 1 - \frac{k'_3 \cdot k'_2 \cdot \exp\left(-k'_1 \cdot \frac{W}{v}\right)}{(k'_1 - k'_3) \cdot (k'_1 - k'_2)} \quad (\text{S-41})$$

$$+ \frac{k'_3 \cdot k'_1 \cdot \exp\left(-k'_2 \cdot \frac{W}{v}\right)}{(k'_1 - k'_2) \cdot (k'_2 - k'_3)} - \frac{k'_1 \cdot k'_2 \cdot \exp\left(-k'_3 \cdot \frac{W}{v}\right)}{(k'_2 - k'_3) \cdot (k'_1 - k'_3)} \quad (\text{S-42})$$

$$X_4 = 1 - \exp\left(-k'_4 \cdot \frac{W}{v}\right) \quad (\text{S-43})$$

This can be used to evaluate the kinetic parameters of the system, where  $k'_1$  corresponds to the rate of hydrogenation,  $k'_2$  corresponds to the rate of hydrogenolysis,  $k'_3$  corresponds to the rate of hydrodeoxygenation, and  $k'_4$  corresponds to the rate of cracking/decarbonylation.

## S-4 Detailed Evolution of Product Concentration During Stability Tests with Ni/ZrO<sub>2</sub>

All liquid samples were analyzed by GC-MS/FID and detailed product compositions were obtained in all experiments. This is summarized in the following figures. All experiments were conducted at 250 °C and 100 bar, with an oil flow of 0.2 ml/min (WHSV = 4.0 h<sup>-1</sup>) and gas flow of 400 Nml/min.

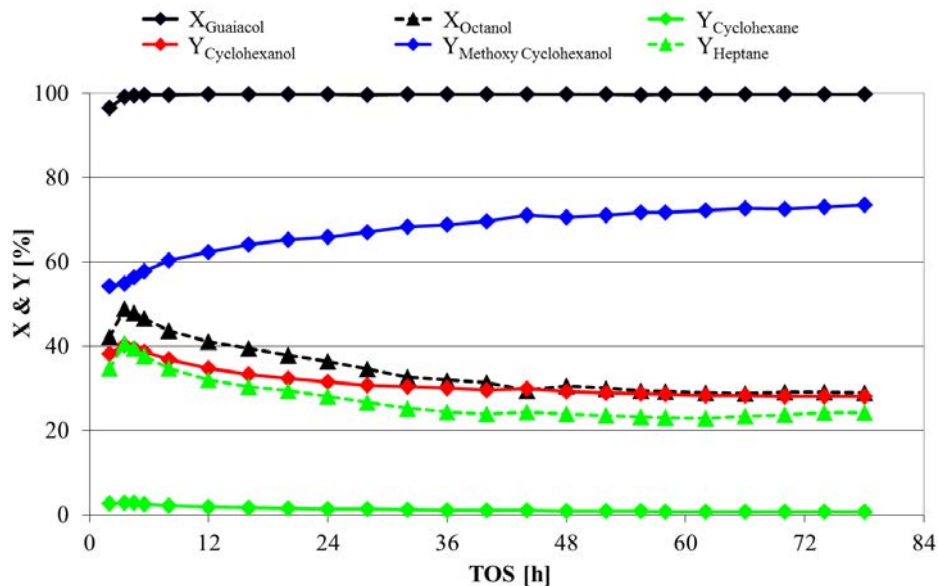

Figure S-4: Conversion of guaiacol and 1-octanol and yield of heptane, cyclohexane, cyclohexanol, 2-methoxy-cyclohexanol DOD for a calcined 5 wt%Ni/ZrO<sub>2</sub> as a function of TOS. T = 250 °C, P = 100 bar,  $F_{oil}$  = 0.2 ml/min, WHSV = 4.0 h<sup>-1</sup>.



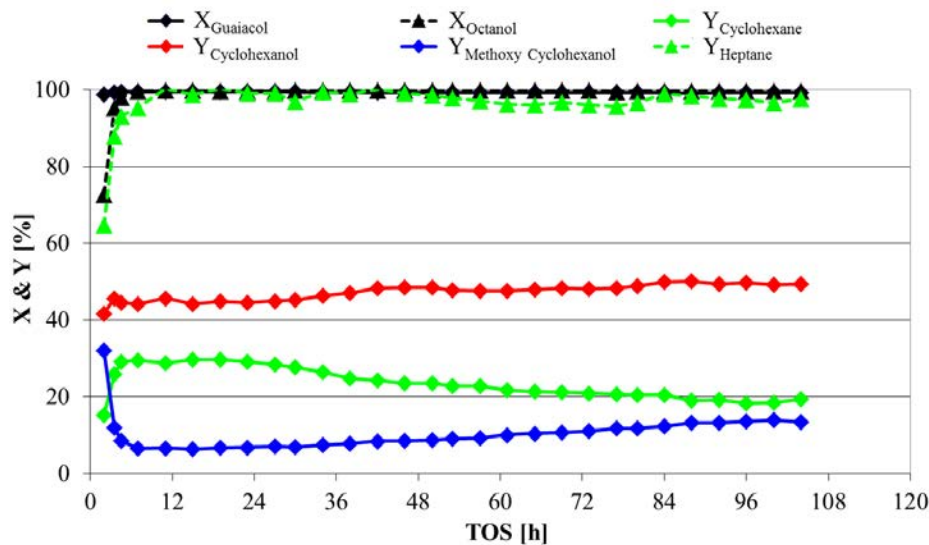

Figure S-5: Conversion of guaiacol and 1-octanol and yield of heptane, cyclohexane, cyclohexanol, 2-methoxy-cyclohexanol DOD for an un-calcined 5 wt%Ni/ZrO<sub>2</sub> as a function of TOS. T = 250 °C, P = 100 bar,  $F_{oil} = 0.2$  ml/min, WHSV = 4.0 h<sup>-1</sup>.

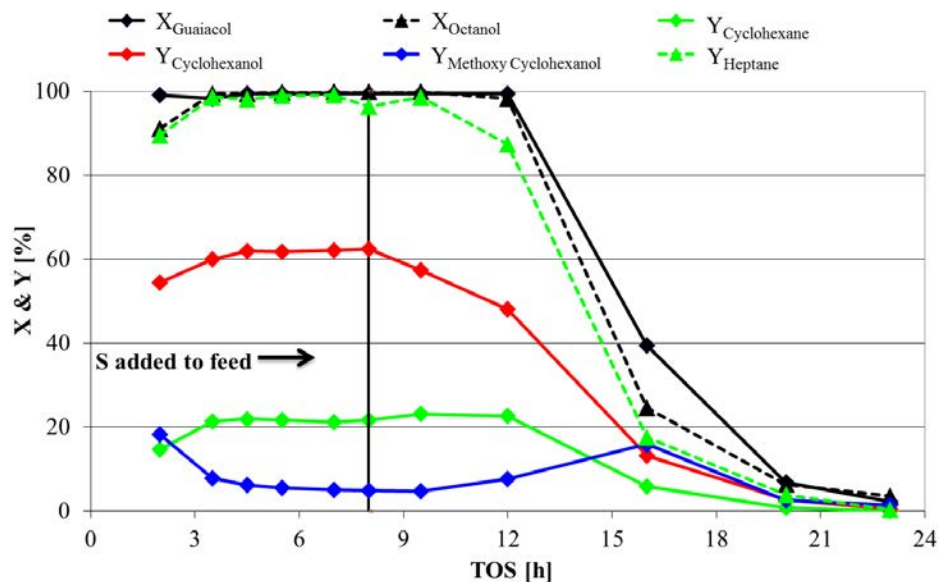

Figure S-6: Conversion of guaiacol and 1-octanol and yield of heptane, cyclohexane, cyclohexanol, 2-methoxy-cyclohexanol DOD for an un-calcined 5 wt%Ni/ZrO<sub>2</sub> as a function of TOS deactivated by 0.05 wt% sulfur from 8 h of TOS. T = 250 °C, P = 100 bar,  $F_{oil} = 0.2$  ml/min, WHSV = 4.0 h<sup>-1</sup>.

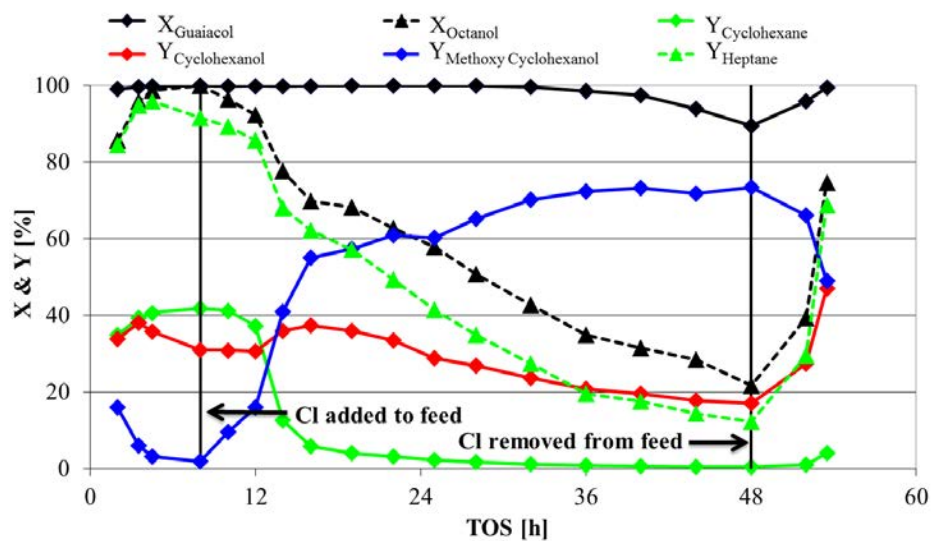

Figure S-7: Conversion of guaiacol and 1-octanol and yield of heptane, cyclohexane, cyclohexanol, 2-methoxy-cyclohexanol DOD for an un-calcined 5 wt%Ni/ZrO<sub>2</sub> as a function of TOS deactivated by 0.05 wt% chlorine from 8 h to 48 h of TOS. T = 250 °C, P = 100 bar,  $F_{oil} = 0.2$  ml/min, WHSV = 4.0 h<sup>-1</sup>.

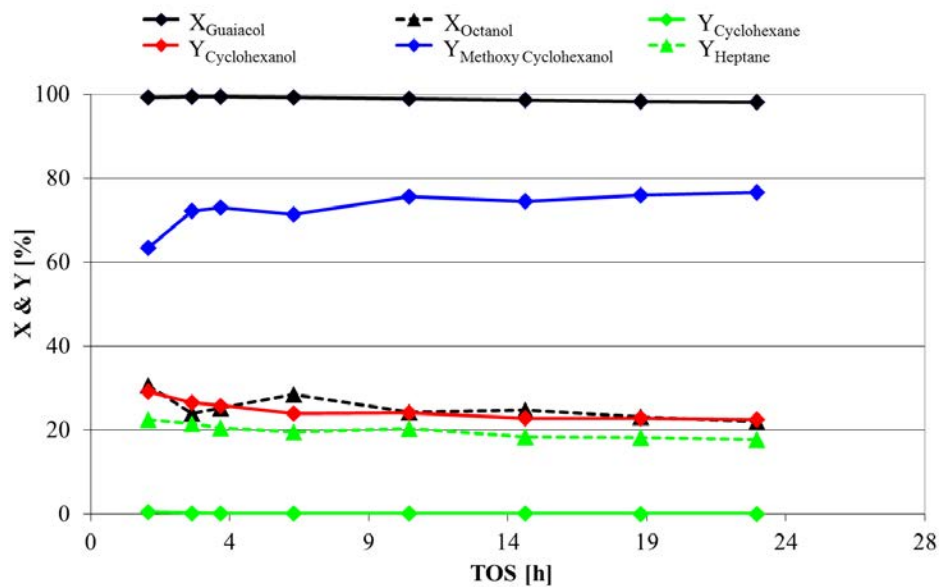

Figure S-8: Conversion of guaiacol and 1-octanol and yield of heptane, cyclohexane, cyclohexanol, 2-methoxy-cyclohexanol DOD for an un-calcined 5 wt%Ni/ZrO<sub>2</sub> impregnated with KCl as a function of TOS. T = 250 °C, P = 100 bar,  $F_{oil} = 0.2$  ml/min, WHSV = 4.0 h<sup>-1</sup>.

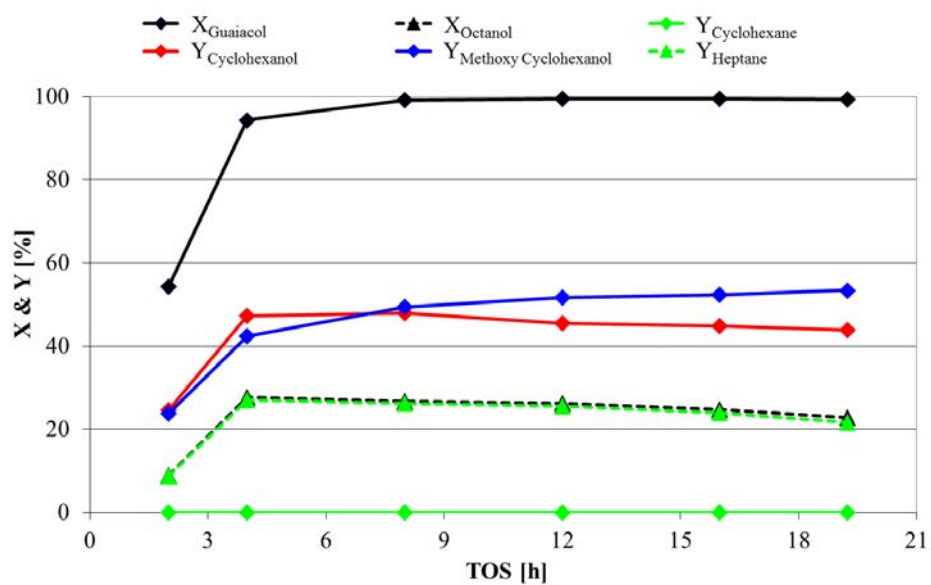

Figure S-9: Conversion of guaiacol and 1-octanol and yield of heptane, cyclohexane, cyclohexanol, 2-methoxy-cyclohexanol DOD for an un-calcined 5 wt%Ni/ZrO<sub>2</sub> impregnated with KNO<sub>3</sub> as a function of TOS. T = 250 °C, P = 100 bar,  $F_{oil} = 0.2$  ml/min, WHSV = 4.0 h<sup>-1</sup>.

## S-5 EXAFS Analysis of Poisoned Catalysts

Initially, the local structure of the fresh calcined Ni/ZrO<sub>2</sub> and the in-situ reduction of this catalyst (as discussed in Section S-1) was studied by refining the extended X-ray absorption fine structure (EXAFS) spectra. Figure S-10 presents the experimental and refined Fourier transformed EXAFS spectra ( $k_3$  and  $k_2$  weighted, respectively) of the calcined (Figure 10(a)) and reduced (Figure 10(b)) catalysts. The Fourier transformed spectra, besides being a filter, give an intuitive and immediate idea of the radial atomic distribution around the absorber atom, in this case nickel.

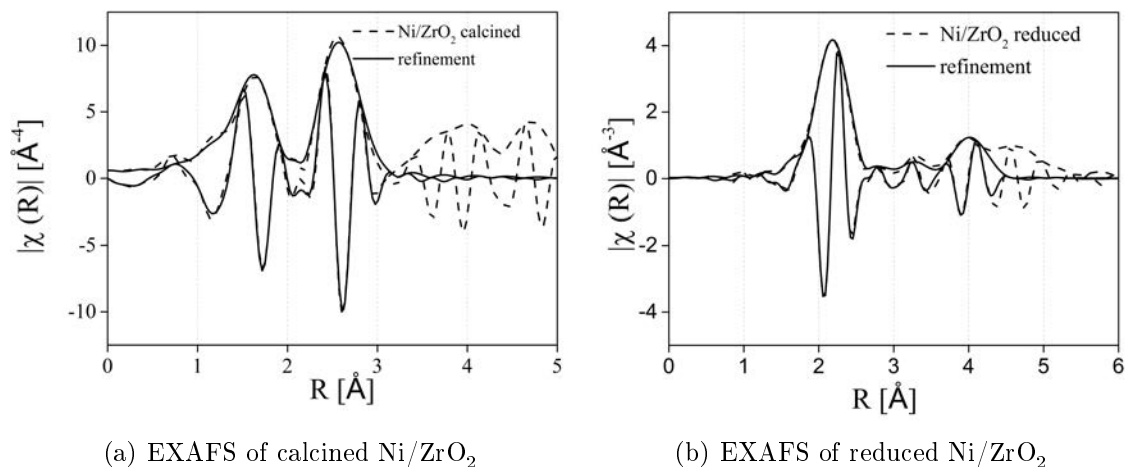

Figure S-10: Experimental (full line) and refinements (dotted line) Fourier Transformed EXAFS spectra at the Ni-K edge of Ni/ZrO<sub>2</sub> catalysts (a) calcined and (b) reduced (not corrected for phase-shifted).

Due to the shoulder below 2  $\text{\AA}$  at the Fourier transformed EXAFS spectra (highlighted in Figure B-11(a)), the refinements of carbon, chlorine, KNO<sub>3</sub> and KCl poisoned catalyst were carried out considering one and two shells. The best results were found for the two shells approach. All refinements and Fourier Transformed EXAFS spectra are presented in the figures.

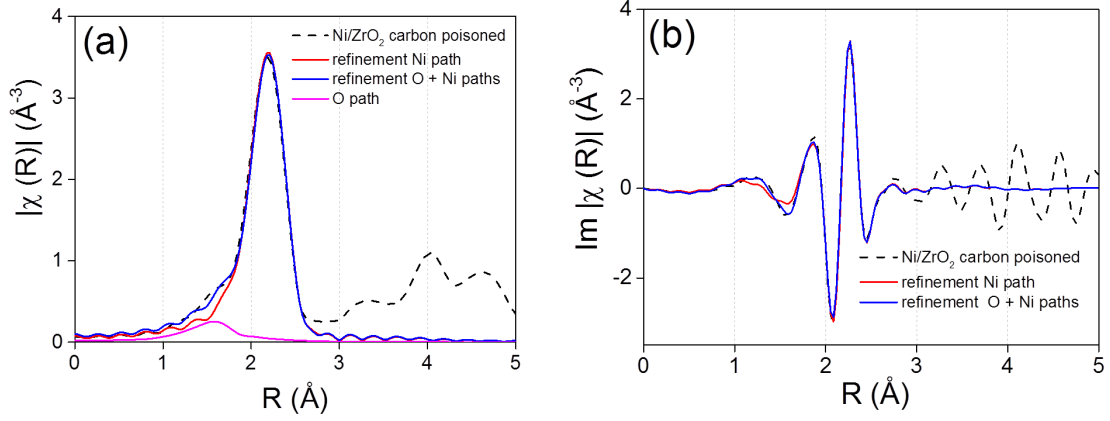

Figure S-11: Fourier transformed EXAFS spectra of carbon poisoned Ni/ZrO<sub>2</sub> catalysts.

Table S-1: Results of the data fits of the Ni-K-edge EXAFS spectra for the carbon poisoned Ni/ZrO<sub>2</sub> catalysts. N is the number of neighboring atoms, r the distance,  $\sigma^2$  the mean-square disorder in the atomic distances, and  $\rho$  the misfit between experimental data and theory. Index *f* and *c* respectively indicates fitted and constrained. R-Range: 1.0-3.0 Å,  $S_0^2 = 0.78$ , 1<sup>st</sup> model:  $\Delta E_0 = 6.6 \pm 0.8$ , 2<sup>nd</sup>:  $\Delta E_0 = 5.8 \pm 0.9$

| Sample | Model           | Atom | N               | r<br>[Å]          | $\sigma^2 \cdot 10^{-3}$<br>[Å <sup>2</sup> ] | $\rho$<br>[%] |
|--------|-----------------|------|-----------------|-------------------|-----------------------------------------------|---------------|
| Carbon | 1 <sup>st</sup> | Ni   | $8.6 \pm 0.9^f$ | $2.49 \pm 0.01^f$ | $6.2 \pm 1.0^f$                               | 2.6           |
|        | 2 <sup>nd</sup> | O    | $0.8 \pm 0.3^f$ | $1.98 \pm 0.05^f$ | $7.1 \pm 0.1^{fa}$                            | 0.5           |
|        |                 | Ni   | $8.7 \pm 0.9^f$ | $2.48 \pm 0.01^f$ | $6.3 \pm 1.0^f$                               |               |

<sup>a</sup>Ni-O  $\sigma^2$  was constrained and fitted together with NiCO<sub>3</sub> reference

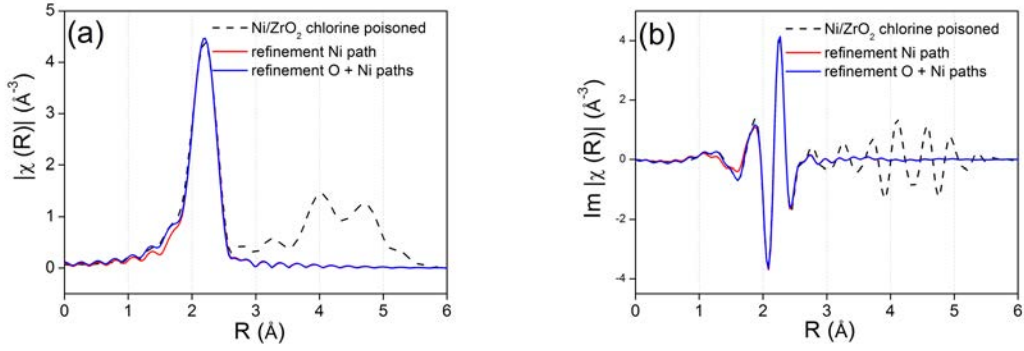

Figure S-12: Fourier transformed EXAFS spectra of chlorine poisoned Ni/ZrO<sub>2</sub> catalysts.

Table S-2: Results of the data fits of the Ni-K-edge EXAFS spectra for the chlorine poisoned Ni/ZrO<sub>2</sub> catalysts. N is the number of neighboring atoms, r the distance,  $\sigma^2$  the mean-square disorder in the atomic distances, and  $\rho$  the misfit between experimental data and theory. Index *f* and *c* respectively indicates fitted and constrained. R-Range: 1.0-3.0 Å,  $S_0^2 = 0.78$ , 1<sup>st</sup> model:  $\Delta E_0 = 7.0 \pm 0.0$ , 2<sup>nd</sup> model:  $\Delta E_0 = 6.6 \pm 1.4$

| Sample   | Model           | Atom | N               | r<br>[Å]            | $\sigma^2 \cdot 10^{-3}$<br>[Å <sup>2</sup> ] | $\rho$<br>[%] |
|----------|-----------------|------|-----------------|---------------------|-----------------------------------------------|---------------|
| Chlorine | 1 <sup>st</sup> | Ni   | $8.6 \pm 0.8^f$ | $2.49 \pm 0.01^f$   | $4.6 \pm 1.0^f$                               | 1.9           |
|          | 2 <sup>nd</sup> | O    | $0.8 \pm 0.2^f$ | $2.00 \pm 0.04^f$   | $7.2 \pm 0.1^f$ <sup>a</sup>                  | 0.9           |
|          |                 | Ni   | $8.5 \pm 0.6^f$ | $2.48^b \pm 0.01^f$ | $4.5 \pm 1.0^f$                               |               |

<sup>a</sup>Ni-O  $\sigma^2$  was constrained and fitted together with NiCO<sub>3</sub> reference

<sup>b</sup>Fitted uncertainty less than 1%

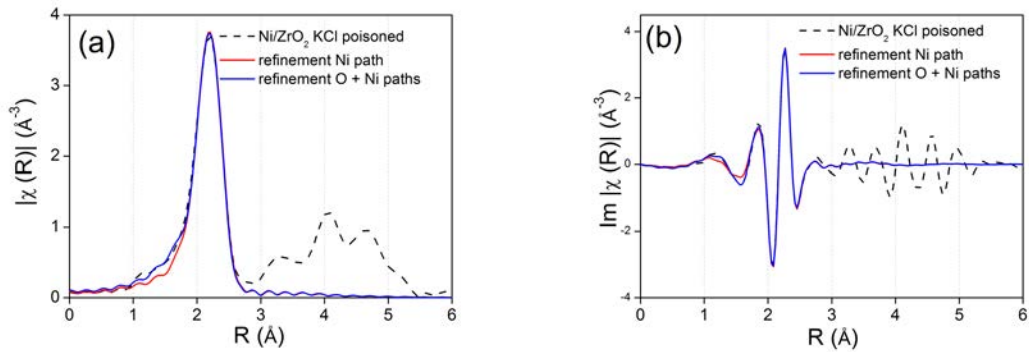

Figure S-13: Fourier transformed EXAFS spectra of KCl poisoned Ni/ZrO<sub>2</sub> catalysts.

Table S-3: Results of the data fits of the Ni-K-edge EXAFS spectra for the KCl poisoned Ni/ZrO<sub>2</sub> catalysts. N is the number of neighboring atoms, r the distance,  $\sigma^2$  the mean-square disorder in the atomic distances, and  $\rho$  the misfit between experimental data and theory. Index *f* and *c* respectively indicates fitted and constrained. R-Range: 1.0-3.0 Å,  $S_0^2 = 0.78$ , 1<sup>st</sup> model:  $\Delta E_0 = 7.1 \pm 0.7$ , 2<sup>nd</sup> model:  $\Delta E_0 = 6.7 \pm 0.3$

| Sample | Model           | Atom | N                | r<br>[Å]          | $\sigma^2 \cdot 10^{-3}$<br>[Å <sup>2</sup> ] | $\rho$<br>[%] |
|--------|-----------------|------|------------------|-------------------|-----------------------------------------------|---------------|
| KCl    | 1 <sup>st</sup> | Ni   | $10.0 \pm 0.8^f$ | $2.49 \pm 0.01^f$ | $7.0 \pm 1.0^f$                               | 1.2           |
|        | 2 <sup>nd</sup> | O    | $0.6 \pm 0.1^f$  | $2.00 \pm 0.04^f$ | $7.2 \pm 0.1^{fa}$                            | 0.9           |
|        |                 | Ni   | $9.9 \pm 0.4^f$  | $2.48^{fb}$       | $6.8 \pm 0.5^f$                               |               |

<sup>a</sup>Ni-O  $\sigma^2$  was constrained and fitted together with NiCO<sub>3</sub> reference

<sup>b</sup>Fitted uncertainty less than 1%

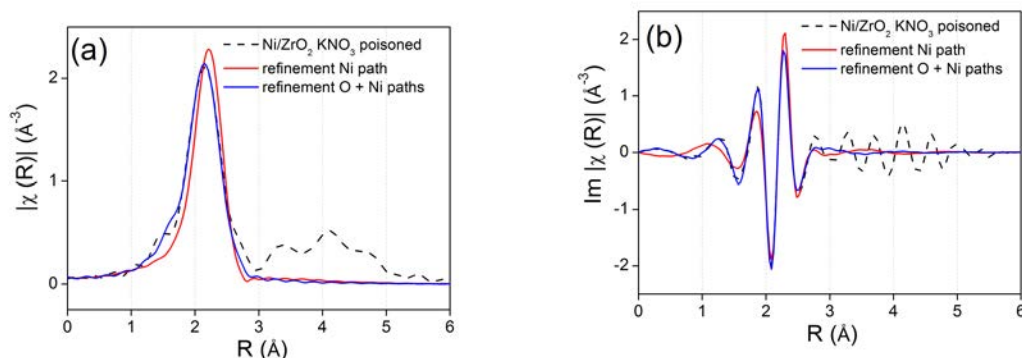

Figure S-14: Fourier transformed EXAFS spectra of KNO<sub>3</sub> poisoned Ni/ZrO<sub>2</sub> catalysts.

Table S-4: Results of the data fits of the Ni-K-edge EXAFS spectra for the KNO<sub>3</sub> poisoned Ni/ZrO<sub>2</sub> catalysts. N is the number of neighboring atoms, r the distance,  $\sigma^2$  the mean-square disorder in the atomic distances, and  $\rho$  the misfit between experimental data and theory. Index *f* and *c* respectively indicates fitted and constrained. R-Range: 1.0-3.0 Å,  $S_0^2 = 0.78$ , 1<sup>st</sup> model:  $\Delta E_0 = 3.3 \pm 2.0$ , 2<sup>nd</sup> model:  $\Delta E_0 = 6.6 \pm 1.0$

| Sample           | Model           | Atom | N               | r<br>[Å]          | $\sigma^2 \cdot 10^{-3}$<br>[Å <sup>2</sup> ] | $C_3 \cdot 10^{-4}$<br>[Å <sup>3</sup> ] | $\rho$<br>[%] |
|------------------|-----------------|------|-----------------|-------------------|-----------------------------------------------|------------------------------------------|---------------|
| KNO <sub>3</sub> | 1 <sup>st</sup> | Ni   | $7.5 \pm 1.4^f$ | $2.49 \pm 0.01^f$ | $8.5 \pm 1.6^f$                               | -                                        | 5.4           |
|                  | 2 <sup>nd</sup> | O    | $1.1 \pm 0.3^f$ | $1.96 \pm 0.01^f$ | $7.9 \pm 4.5^{fa}$                            |                                          | 1.3           |
|                  |                 | Ni   | $8.3 \pm 0.9^f$ | $2.48 \pm 0.01^f$ | $9.2 \pm 1.0^f$                               | $4.9.2 \pm 1.0^f$                        |               |

<sup>a</sup>Ni-O  $\sigma^2$  was constrained and fitted together with NiCO<sub>3</sub> reference

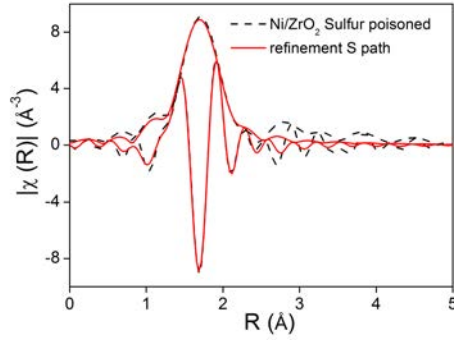

Figure S-15: Fourier transformed EXAFS spectra of sulfur poisoned Ni/ZrO<sub>2</sub> catalysts.

Table S-5: Results of the data fits of the Ni-K-edge EXAFS spectra for the sulfur poisoned Ni/ZrO<sub>2</sub> catalysts. N is the number of neighboring atoms, r the distance,  $\sigma^2$  the mean-square disorder in the atomic distances, and  $\rho$  the misfit between experimental data and theory. Index *f* and *c* respectively indicates fitted and constrained. R-Range: 1.11-2.50 Å,  $S_0^2 = 0.78$ ,  $\Delta E_0 = -8.4 \pm 0.5$

| Sample | Atom | N                | r<br>[Å]                 | $\sigma^2 \cdot 10^{-3}$<br>[Å <sup>2</sup> ] | $\rho$<br>[%] |
|--------|------|------------------|--------------------------|-----------------------------------------------|---------------|
| Suflur | S    | 5.0 <sup>c</sup> | 2.22 ± 0.01 <sup>f</sup> | 7.6 ± 0.4 <sup>f</sup>                        | 2.5           |



## References

- [1] H. S. Fogler. *Elements of Chemical Reaction Engineering*. Prentice Hall: New Jersey, 2006.
- [2] C. R. Wilke and P. Chang. Correlation of diffusion coefficients in dilute solutions. *AIChE J.*, 1:264–270, 1955.
- [3] R. B. Bird, W. E. Stewart, and E. N. Lightfoot. *Transport Phenomena*. John Wiley & Sons, Inc.: New York, 2007.
- [4] T. Shinomiya. Dielectric dispersion and intermolecular association for 28 pure liquid alcohols the position dependence of hydroxyl group in the hydrocarbon chain. *B. Chem. Soc. Jpn.*, 62:908–914, 1989.
- [5] C. N. Satterfield and T. K. Sherwood. *The Role of Diffusion in Catalysis*. Addison-Wesley: London, 1963.
- [6] Stephen J. Hurff and Michael T. Klein. Reaction pathway analysis of thermal and catalytic lignin fragmentation by use of model compounds. *Ind. Eng. Chem. Fundam.*, 22:426–430, 1983.
- [7] P. M. Mortensen, J.-D. Grunwaldt, P. A. Jensen, and A. D. Jensen. Screening of catalysts for hydrodeoxygenation of phenol as a model compound for bio-oil. *ACS Catal.*, 3:1774–1785, 2013.
- [8] M. V. Bykova, S. G. Zavarukhin, L. I. Trusov, and V. A. Yakovlev. Guaiacol hydrodeoxygenation kinetics with catalyst deactivation taken into consideration. *Kinet. Catal.*, 54:40–48, 2013.
